# Supplementary material
Source: PubMed Central journal article supplement (PMC4529359)
Supplement: NIHMS702896-supplement-1.pdf [file NIHMS702896-supplement-1.pdf]

## Supplemental Materials

# **NY-ESO-1 specific TCR engineered T-cells mediate sustained antigen-specific antitumor effects in myeloma**

Aaron P. Rapoport<sup>1,#</sup>, Edward A. Stadtmauer<sup>2,#</sup>, Gwendolyn K. Binder-Scholl<sup>3,#</sup>, Olga Goloubeva<sup>1,5</sup>, Dan T. Vogl<sup>2</sup>, Simon Lacey<sup>2</sup>, Ashraf Z. Badros<sup>1</sup>, Alfred Garfall<sup>2</sup>, Brendan Weiss<sup>2</sup>, Jeffrey Finklestein<sup>4,5</sup>, Irina Kulikovskaya<sup>4,5</sup>, Sanjoy K. Sinha<sup>6</sup>, Shari Kronsberg<sup>1,5</sup>, Minnal Gupta<sup>4,5</sup>, Sarah Bond<sup>7</sup>, Luca Melchiori<sup>3</sup>, Joanna E. Brewer<sup>3</sup>, Alan D. Bennett<sup>3</sup>, Andrew B. Gerry<sup>3</sup>, Nick J. Pumphrey<sup>3</sup>, Daniel Williams<sup>3</sup>, Helen K. Tayton- Martin<sup>3</sup>, Lilliam Ribeiro<sup>3</sup>, Tom Holdich<sup>3</sup>, Saul Yanovich<sup>1</sup>, Nancy Hardy<sup>1</sup>, Jean Yared<sup>1</sup>, Naseem Kerr<sup>4</sup>, Sunita Philip<sup>1</sup>, Sandra Westphal<sup>1</sup>, Don L. Siegel<sup>2,4</sup>, Bruce L. Levine<sup>2,4</sup>, Bent K. Jakobsen<sup>3</sup>, Michael Kalos<sup>2,4</sup>, and Carl H. June<sup>2,4\*</sup>

<sup>1</sup>The Marlene and Stewart Greenebaum Cancer Center, University of Maryland School of Medicine, Baltimore, MD, USA

<sup>2</sup> Abramson Cancer Center, Perelman School of Medicine, University of Pennsylvania, Philadelphia, PA, USA

<sup>3</sup>Adaptimmune Ltd, Oxford, UK

<sup>4</sup>Department of Pathology, Perelman School of Medicine, University of Pennsylvania, Philadelphia, PA, USA

<sup>5</sup>Department of Epidemiology and Public Health University of Maryland School of Medicine, Baltimore, MD USA

<sup>6</sup> School of Mathematics and Statistics, Carleton University, Ottawa, Canada

<sup>7</sup> Cambridge Biomedical, Cambridge, Massachusetts, USA

# Contributed equally

\* Correspondence: Carl June ([cjune@exchange.upenn.edu](mailto:cjune@exchange.upenn.edu))

**Supplementary Table 1: Patient demographics and status on the study.** 70% of the patients were Caucasian, 30% were African-American or Hispanic. Fifty percent of the patients were female and the median age at enrollment was 59 (range: 46-72). Patients received a median of 3 lines of prior therapy (range: 1-5); 5 patients (25%) had relapsed after an earlier ASCT. Patients with high risk disease were typically enrolled after receiving their initial line of therapy. Twelve patients (60%) had cytogenetic abnormalities including 7 (35%) with confirmed high-risk abnormalities [t(4;14), del17p13,complex]. Patient responses are shown: Best response prior to infusion (“Pre Inf Resp” column), and responses at day 42, 100 and 180 post infusion, are shown in the last four columns. Administration of protocol-mandated lenalidomide starting at day 100, is noted (“Len. @ dy 100 (Y/N)” column).

| Study ID  | Sex | Race       | Age at Screen | Year Dx | # prior Rx | Prior ASCT | Prior duration of response post ASCT | Chrom Abs                                                     | Date of Infusion | Len. @ dy 100 (Y/N) | Pre Inf Resp | Day 42 Resp | Day 100 Resp | Day 180 Resp |
|-----------|-----|------------|---------------|---------|------------|------------|--------------------------------------|---------------------------------------------------------------|------------------|---------------------|--------------|-------------|--------------|--------------|
| 01411-250 | M   | Cauc       | 72            | 2006    | 4          | Y          | 2yr 8mo                              | t4;14                                                         | 30-Jun-11        | Y                   | PD           | sCR         | sCR          | sCR          |
| 01411-200 | M   | Cauc       | 61            | 2011    | 1          | N          | NA                                   | 17p del, trisomy 11, p53 overexpression                       | 26-Aug-11        | Y                   | PD           | nCR         | nCR          | nCR          |
| 01411-201 | F   | Cauc       | 55            | 2011    | 1          | N          | NA                                   | t4;14                                                         | 31-Oct-11        | Y                   | PR           | nCR         | nCR          | nCR          |
| 01411-252 | M   | Cauc       | 72            | 2002    | 4          | Y          | 4 yr                                 | loss chr 13, del14, del17                                     | 5-Jan-12         | N                   | PR           | PR          | PR           | PR           |
| 01411-253 | F   | Black      | 46            | 2010    | 2          | Y          | 7.5 mos                              | complex                                                       | 19-Jan-12        | Y                   | PD           | nCR         | nCR          | PD           |
| 01411-204 | F   | Hisp /Cauc | 66            | 2010    | 4          | N          | NA                                   | none                                                          | 3-Feb-12         | Y                   | PR           | VGPR        | nCR          | PD           |
| 01411-206 | M   | Cauc       | 63            | 2011    | 1          | N          | NA                                   | 14 translocation                                              | 23-Mar-12        | Y                   | VGPR         | VGPR        | VGPR         | VGPR         |
| 01411-254 | F   | Cauc       | 49            | 2010    | 4          | N          | NA                                   | monosomy 13, trisomy 11 at diagnosis. None at time of screen. | 29-Mar-12        | Y                   | SD           | PR          | PR           | PD           |

Supplemental Data – NY-ESO<sup>c259</sup>-T for myeloma

| Study ID  | Sex | Race  | Age at Screen | Year Dx | # prior Rx | Prior ASCT | Prior duration of response post ASCT | Chrom Abs                                                                                          | Date of Infusion | Len. @ dy 100 (Y/N) | Pre Inf Resp | Day 42 Resp | Day 100 Resp | Day 180 Resp |
|-----------|-----|-------|---------------|---------|------------|------------|--------------------------------------|----------------------------------------------------------------------------------------------------|------------------|---------------------|--------------|-------------|--------------|--------------|
| 01411-207 | F   | Black | 66            | 2011    | 1          | N          | NA                                   | 13 del                                                                                             | 13-Apr-12        | Y                   | PR           | VGPR        | nCR          | nCR          |
| 01411-202 | F   | Black | 47            | 2011    | 1          | N          | NA                                   | 13 del                                                                                             | 20-Apr-12        | N                   | PR           | PR          | nCR          | nCR          |
| 01411-255 | M   | Cauc  | 59            | 2011    | 2          | N          | NA                                   | none                                                                                               | 11-May-12        | N                   | SD           | PR          | nCR          | nCR          |
| 01411-208 | M   | Cauc  | 44            | 2006    | 5          | Y          | 4 yr 4 mo                            | none                                                                                               | NA               | NA                  | NA           | NA          | NA           | NA           |
| 01411-209 | M   | Cauc  | 64            | 2011    | 3          | N          | NA                                   | none                                                                                               | 13-Jul-12        | N                   | SD           | VGPR        | nCR          | nCR          |
| 01411-251 | F   | Cauc  | 57            | NA      | NA         | NA         | NA                                   | UNK                                                                                                | NA               | NA                  | NA           | NA          | NA           | NA           |
| 01411-203 | M   | Cauc  | 56            | 2011    | 1          | N          | NA                                   | none                                                                                               | NA               | NA                  | NA           | NA          | NA           | NA           |
| 01411-205 | F   | Cauc  | 50            | 2009    | 7          | Y          | 10 mo                                | none                                                                                               | NA               | NA                  | NA           | NA          | NA           | NA           |
| 01411-210 | M   | Black | 53            | 2011    | 2          | N          | NA                                   | none                                                                                               | 17-Aug-12        | Y                   | SD           | VGPR        | VGPR         | VGPR         |
| 01411-211 | F   | Cauc  | 66            | 2012    | 3          | N          | NA                                   | UNK                                                                                                | 24-Aug-12        | Y                   | SD           | VGPR        | nCR          | nCR          |
| 01411-256 | M   | Cauc  | 54            | 2011    | 2          | N          | NA                                   | none                                                                                               | 30-Aug-12        | Y                   | nCR          | VGPR        | nCR          | CR           |
| 01411-257 | M   | Cauc  | 59            | 2012    | 2          | N          | NA                                   | NA                                                                                                 | 4-Dec-12         | N                   | VGPR         | SD          | PD           | NA           |
| 01411-258 | M   | Cauc  | 47            | 2010    | 4          | Y          | 15 mon                               | complex karyotype with loss of 6q, gain of 1q21, loss of 13q14 by G banding & FISH analysis        | 6-Jan-13         | Y                   | PD           | nCR         | nCR          | nCR          |
| 01411-212 | M   | Cauc  | 70            | 2012    | 1          | N          | NA                                   | deletion-Y in 8 of 20 cells. positive for deletion 13q14                                           | 15-Feb-13        | N                   | PR           | nCR         | CR           | CR           |
| 01411-259 | M   | Cauc  | 50            | 2012    | 4          | Y          | 6 mo                                 | Deletion 17p13 in 5 out of 23 cells. Deletion 13q14, trisomy 3, and perhaps a t4;14 translocation. | 18-Apr-13        | Y                   | PD           | nCR         | sCR          | sCR          |
| 01411-260 | F   | Black | 59            | 2011    | 1          | N          | NA                                   | none                                                                                               | 1-Aug-13         | N                   | SD           | SD          | SD           | SD           |

**Supplementary Table 2. Phenotypic analysis of cell product.** The NY-ESO<sup>c259</sup> TCR contains a Vβ13.1 chain, which is used to detect CD4 and CD8 T cells that carry the TCR. Approximately 1-5% of non-gene-modified cells will also carry the Vβ13.1 chain and therefore transduction rates are slightly lower than shown. Patient 260 product was analyzed using a different flow cytometry panel, and therefore the percentage of CD4 and CD8 is shown in the Vβ13.1 positive population and these numbers are excluded from the summary analysis.

| Patient ID     | CD3%        | %CD62L in CD3 | %CD3+Vβ13.1 | %CD4 in CD3 | %CD8 in CD3 |
|----------------|-------------|---------------|-------------|-------------|-------------|
| 250            | 98.5        | 62.6          | 46.9        | NA          | NA          |
| 200            | 87.3        | 95.2          | 34.3        | 76.4        | 31.9        |
| 201            | 99.5        | 98.6          | 34.3        | 54.8        | 47.6        |
| 252            | 95.9        | 89.4          | 30.0        | 34.8        | 67.3        |
| 253            | 98.5        | 98.3          | 23.5        | 26.3        | 75.2        |
| 204            | 98.3        | 98.0          | 26.6        | 80.5        | 21.2        |
| 206            | 99.3        | 98.7          | 34.6        | 52.0        | 65.9        |
| 254            | 99.9        | 93.5          | 33.2        | 52.1        | 47.2        |
| 207            | 99.6        | NA            | 37.8        | 83.7        | 24.9        |
| 202            | 99.8        | 96.2          | 37.4        | 37.8        | 62.6        |
| 255            | 99.9        | 88.1          | 31.4        | 74.5        | 24.6        |
| 209            | 99.8        | 87.6          | 18.2        | 80.1        | 24.0        |
| 210            | 99.4        | 92.0          | 33.8        | 66.1        | 43.7        |
| 211            | 99.5        | 98.1          | 29.9        | 66.9        | 34.6        |
| 256            | 99.8        | 85.5          | 41.9        | 51.5        | 59.0        |
| 257            | 99.8        | NA            | 31.0        | 60.0        | 41.0        |
| 258            | 99.7        | 97.0          | 27.0        | 82.0        | 18.0        |
| 212            | 99.3        | 45.4          | 37.6        | 69.0        | 30.9        |
| 259            | 99.8        | 86.9          | 49.1        | 49.8        | 51.1        |
| 260            | 98.6        | ND            | 29.3        | 47.5        | 20.3        |
| <b>Median</b>  | <b>99.5</b> | <b>93.5</b>   | <b>33.5</b> | <b>63.1</b> | <b>42.4</b> |
| <b>Minimum</b> | <b>87.3</b> | <b>45.4</b>   | <b>18.2</b> | <b>26.3</b> | <b>18.0</b> |
| <b>Maximum</b> | <b>99.9</b> | <b>98.7</b>   | <b>49.1</b> | <b>83.7</b> | <b>75.2</b> |

%CD4 in Vβ 13.1

%CD8 in Vβ 13.1

**Supplementary Table 3. Evaluation of gene modified cell persistence in blood by PCR during long term follow-up.** 7/10 have detectable cells above the limit of detection, but below the limit of quantitation (LOQ) for the assay. Two patients have quantifiable levels (<1% and 2%).

| Patient ID | Vector copies per microgram DNA (percent marking) |                   |               |
|------------|---------------------------------------------------|-------------------|---------------|
|            | Year 2                                            | Year 2.5          | Year 3        |
| 201        | <i>missing</i>                                    | 3800.8 (2.39)     | 4511.7 (2.84) |
| 252        | 465.0 (0.29)                                      | 531.5 (0.33)      |               |
| 206        | Positive but <LOQ                                 | Positive but <LOQ |               |
| 254        | Negative                                          | Negative          |               |
| 207        | Positive but <LOQ                                 | Positive but <LOQ |               |
| 255        | Positive but <LOQ                                 |                   |               |
| 209        | Positive but <LOQ                                 |                   |               |
| 210        | Positive but <LOQ                                 |                   |               |
| 211        | Positive but <LOQ                                 |                   |               |
| 256        | Positive but <LOQ                                 |                   |               |

**Supplementary Table 4. Elevation of IL-6 in patients following T cell infusion.** The cytokines ILI- $\beta$ , IL-10, IL-13, IL-6, IL-12, IL-17, GM-CSF, IL-15, IL-5, IFN- $\gamma$ , IFN- $\alpha$  were routinely monitored in patients. Of these, IL-6 was increased in nearly all patients, to levels that are higher than expected with transplantation alone (5–10 pg/ml)<sup>1</sup>, and are comparable to levels observed with CD19-41BB CAR<sup>2,3</sup>, despite the absence of clear clinical signals for CRS in our study.

| Patient ID    | pre    | day 3 or 5 | day 7   | day 14 | day 21   | day 28 | peak day | max fold increase |
|---------------|--------|------------|---------|--------|----------|--------|----------|-------------------|
| 250           | 7.27   | 5.5        | 21.05   | 257.77 | 13880.65 | ND     | 21       | 1909              |
| 200           | 6.25   | 11.58      | 88.71   | 139.17 | 26.06    | 7.70   | 14       | 22.3              |
| 201           | 4.39   | 9.36       | 146.13  | 26.79  | 22.02    | 39.23  | 7        | 33.3              |
| 252           | 2.48   | 17.24      | 74.94   | ND     | 16.69    | 8.07   | 7        | 30.2              |
| 253           | 2.13   | 4.74       | 4839.30 | 45.03  | 8.06     | 2.23   | 7        | 2272              |
| 204           | 8.65   | 9.34       | 2208.51 | 20.61  | 17.68    | 20.34  | 7        | 255               |
| 206           | 4.13   | 7.97       | 45.49   | 3.94   | 4.14     | 4.80   | 7        | 11.0              |
| 254           | 3.40   | 2.17       | 11.11   | 37.02  | 2.45     | 2.50   | 14       | 10.9              |
| 207           | 2.15   | 5.40       | 35.27   | 4.86   | 10.38    | 215.02 | 28       | 100               |
| 202           | 4.70   | 10.32      | 49.36   | 18.94  | 16.04    | 2.91   | 7        | 10.5              |
| 255           | 2.69   | 3.25       | 9.16    | 5.62   | 13.90    | 9.85   | 21       | 5.2               |
| 209           | 2.04   | 2.52       | 46.09   | 7.09   | 4.12     | 4.84   | 7        | 22.6              |
| 210           | 3.29   | 6.38       | 10.36   | 11.79  | 27.24    | 8.61   | 21       | 8.3               |
| 211           | 2.50   | 4.86       | 46.08   | 22.80  | 5.05     | 3.58   | 7        | 18.43             |
| 256           | 1.76   | 45.05      | 66.60   | 29.70  | 6.62     | 8.59   | 7        | 37.84             |
| 257           | M      | M          | M       | M      | M        | M      | NA       | NA                |
| 258           | M      | M          | M       | M      | M        | M      | NA       | NA                |
| 212           | 0.69   | 5.65       | 86.15   | 13.54  | ND       | ND     | NA       | NA                |
| 259           | 333.39 | 23.21      | 81.40   | 12.22  | 677.32   | 568.83 | 21       | 2.03              |
| 260           | M      | M          | M       | M      | M        | M      | NA       | NA                |
| <b>Median</b> |        |            |         |        |          |        | 7        | 22                |

1. Condomines, M., et al. Increased plasma-immune cytokines throughout the high-dose melphalan-induced lymphodepletion in patients with multiple myeloma: a window for adoptive immunotherapy. *Journal of immunology* 184, 1079-1084 (2010).

2. Kalos, M., et al. T cells with chimeric antigen receptors have potent antitumor effects and can establish memory in patients with advanced leukemia. *Science translational medicine* 3, 95ra73 (2011).

3. Maude, S.L., et al. Chimeric antigen receptor T cells for sustained remissions in leukemia. *The New England journal of medicine* 371, 1507-1517 (2014).

**Supplementary Table 5. List of serious adverse events on the study.**

| Pt #      | T-cell infusion date | Study dose   | TD %  | Date of onset | End date  | Realday | Diagnosis                      | Grade | Outcome   | Relationship |
|-----------|----------------------|--------------|-------|---------------|-----------|---------|--------------------------------|-------|-----------|--------------|
| 01411-202 | 20-Apr-12            | 7.87 billion | 37.4% | 23-Jul-12     | 30-Jul-12 | 94      | Hypoxia                        | 3     | Recovered | Possible     |
| 01411-201 | 31-Oct-11            | 9.5 billion  | 34.0% | 2-May-12      | 18-May-12 | 184     | Neutropenia                    | 4     | Recovered | Possible     |
| 01411-204 | 3-Feb-12             | 8.82 billion | 26.6% | 21-Mar-12     | 26-Mar-12 | 47      | Hyponatremia                   | 4     | Recovered | Possible     |
| 01411-209 | 13-Jul-12            | 9.46 billion | 18.2% | 19-Jul-12     | 27-Jul-12 | 6       | Hypotension                    | 3     | Recovered | Possible     |
| 01411-209 | 13-Jul-12            | 9.46 billion | 18.2% | 9-Aug-12      | 19-Nov-12 | 27      | Graft Versus Host Disease - GI | 3     | Recovered | Possible     |
| 01411-209 | 13-Jul-12            | 9.46 billion | 18.2% | 15-Oct-12     | 19-Nov-12 | 94      | Pancytopenia                   | 4     | Recovered | Possible     |
| 01411-253 | 19-Jan-12            | 5.99 billion | 23.5% | 2-Feb-12      | 8-Feb-12  | 14      | Dehydration                    | 3     | Recovered | Possible     |

**Supplementary Table 6. List of adverse events at least probably related to the study.**

| Data cut off: 31st July 2013                                |                  |         |         |         |         |
|-------------------------------------------------------------|------------------|---------|---------|---------|---------|
| System Organ Class                                          | Number of events |         |         |         |         |
| Preferred Term                                              | Event (%)        | Grade 1 | Grade 2 | Grade 3 | Grade 4 |
| <b>Allergy/Immunology</b>                                   | <b>5 (29)</b>    |         |         |         |         |
| Graft Versus Host Disease - GI                              | 3 (60)           | 0 (0)   | 0       | 3 (100) | 0 (0)   |
| Graft Versus Host Disease-skin                              | 2 (40)           | 0 (0)   | 2 (100) | 0 (0)   | 0 (0)   |
| <b>Constitutional Symptoms</b>                              | <b>3 (18)</b>    |         |         |         |         |
| Fatigue                                                     | 1 (33)           | 1 (100) | 0       | 0 (0)   | 0 (0)   |
| Fever                                                       | 2 (67)           | 1 (50)  | 1 (50)  | 0 (0)   | 0 (0)   |
| <b>Skin and subcutaneous tissue disorders</b>               | <b>3 (18)</b>    |         |         |         |         |
| Rash                                                        | 3 (100)          | 1 (33)  | 1 (33)  | 1 (33)  | 0 (0)   |
| <b>Gastrointestinal</b>                                     | <b>2 (11)</b>    |         |         |         |         |
| Diarrhea                                                    | 2 (100)          | 1 (50)  | 1 (50)  | 0 (0)   | 0 (0)   |
| <b>Cardiac disorders</b>                                    | <b>1 (6)</b>     |         |         |         |         |
| Sinus tachycardia                                           | 1 (100)          | 1 (100) | 0       | 0 (0)   | 0 (0)   |
| <b>Dermatology/Skin</b>                                     | <b>1 (6)</b>     |         |         |         |         |
| Injection site reaction/extravasation changes               | 1 (100)          | 1 (100) | 0 (0)   | 0 (0)   | 0 (0)   |
| <b>General disorders and administration site conditions</b> | <b>1 (6)</b>     |         |         |         |         |
| Weakness                                                    | 1 (100)          | 1 (100) | 0 (0)   | 0 (0)   | 0 (0)   |
| <b>Vascular disorders</b>                                   | <b>1 (6)</b>     |         |         |         |         |
| Hypotension                                                 | 1 (100)          | 0 (0)   | 0 (0)   | 1 (100) | 0 (0)   |



**Supplementary Table 7. Evaluation of gene marked cells in affected and non-affected colon biopsy samples.**

| <b>Specimen</b>            |                    | <b>% Vector<sup>+</sup> Cells/<br/>Total Cells</b> |
|----------------------------|--------------------|----------------------------------------------------|
| <b>Penn<br/>Subject #2</b> | Abnormal Colon     | 0.12                                               |
|                            | Normal Colon       | 2.9                                                |
|                            | Skin Biopsy        | 24.8                                               |
|                            | Peripheral Blood   | 4.5                                                |
| <b>Penn<br/>Subject #3</b> | Rectosigmoid Colon | 4.3                                                |
|                            | Terminal Ileum     | 2.1                                                |
|                            | Peripheral Blood   | 1.6                                                |
| <b>Penn<br/>Subject #8</b> | Colon Biopsy       | 2                                                  |
|                            | Upper GI Biopsy    | 4.2                                                |

**Supplementary Table 8. Patterns of relapse.**

| Patient ID                                                                                                                    | Best Response | Timepoint at relapse | Persistence - gene modified cells | NY-ESO Antigen | LAGE Antigen | Conclusions                                                                        |
|-------------------------------------------------------------------------------------------------------------------------------|---------------|----------------------|-----------------------------------|----------------|--------------|------------------------------------------------------------------------------------|
| 250                                                                                                                           | sCR           | 1 year               | 68 cells/ul                       | 0              | 0            | cells present, antigen negative tumor on relapse                                   |
| 200                                                                                                                           | nCR           | 1 year               | 1 cells/uL                        | ND*            | ND*          | loss of persistence, likely antigen positive tumor based on surrounding timepoints |
| 204                                                                                                                           | nCR           | 9 months             | <5 cells/uL**                     | 0.011          | 6.2431       | loss of persistence, antigen positive tumor                                        |
| 253                                                                                                                           | nCR           | 3 months             | 3 cells /uL blood                 | 0.02           | 67           | loss of persistence, antigen positive tumor                                        |
| 254                                                                                                                           | PR            | 6 months             | 6 cells / uL blood                | 0              | 0            | loss of cells, antigen negative tumor on relapse                                   |
| 202                                                                                                                           | nCR           | 1.6 year             | <5 cells/uL                       | ND             | ND           | loss of cells, antigen status unknown                                              |
| 209                                                                                                                           | nCR           | 8 months             | 2 cells /uL blood                 | 0              | 0.0852       | loss of persistence, possible antigen negative tumor                               |
| 257                                                                                                                           | SD            | 4 months             | 3 cells /uL blood                 | 0.0125         | 115.7338     | loss of persistence, antigen positive tumor                                        |
| 258                                                                                                                           | nCR           | 9 months             | ND***                             | 0.0001         | 0            | cells present, very slight antigen detection                                       |
| 259                                                                                                                           | nCR           | 9 months             | 0****                             | 0.0262         | 3.3309       | loss of persistence, antigen positive tumor                                        |
| *Day 360 not performed: day 180 = 0 and 0.3337, NY-ESO and Lage, respectively; day 420 = 0.1065 and 45.7363 (NY-ESO and Lage) |               |                      |                                   |                |              |                                                                                    |
| **day 180 value                                                                                                               |               |                      |                                   |                |              |                                                                                    |
| ***day 270 not available; day 42 =18 cells/uL and month 14 was negative                                                       |               |                      |                                   |                |              |                                                                                    |
| ****Month 9 PBMC sample not received. Month 9 marrow negative. Month 6 PBMC <LOD                                              |               |                      |                                   |                |              |                                                                                    |

**Supplementary Table 9. Results for the mixed-effects model of analyzing response profile: T-cell persistence in blood is inversely correlated with NY-ESO-1 levels in marrow.**

| Effect    | Estimate& | Std. Err. | p-value |
|-----------|-----------|-----------|---------|
| Intercept | 4.55      | 1.68      | 0.014   |
| NY-ESO-1  | -47.11    | 18.85     | 0.022   |
| LAGE-1    | 1.29      | 0.74      | 0.098   |

&adjusted for time

**Supplementary Table 10. Estimated parameters and probabilities for a fitted joint model for longitudinal data and OS.**

| Variables in the model | Value  | Std.Err. | p-value |
|------------------------|--------|----------|---------|
| NY-ESO-1               | 34.292 | 16.3954  | 0.037   |
| LAGE-1                 | 0.662  | 0.3444   | 0.055   |
| CD138                  | 1.659  | 1.0389   | 0.110   |

\*all values were transformed using a square root transformation to decrease variability and to smooth distribution

**Supplementary Table 11. Estimated parameters and probabilities for a fitted joint model for longitudinal data and PFS.**

| Variables in the model | Value  | Std. Err. | p-value |
|------------------------|--------|-----------|---------|
| NY-ESO-1               | 52.355 | 31.223    | 0.094   |
| LAGE-1                 | 0.675  | 0.365     | 0.065   |
| CD138                  | 1.719  | 1.224     | 0.160   |

\*all values were transformed using a square root transformation to decrease variability and to smooth distribution

**Supplementary Figure 1. Consort statement and overview of manufacture.**

**a.** Overview of the number of HLA-A201 patients screened and who were entered onto the study. Approximately 1 patient, out of 3 screened, was eligible for enrollment based on HLA-A type and antigen expression (24/70 (34)). **b.** 10-12L apheresis product is collected at clinical sites and shipped overnight to a central manufacturing site. Cells were depleted of monocytes and CD25 positive cells, and activated with bead based artificial antigen presenting cells and gene modified with a lentiviral vector. Cells are expanded for 9-12 days and then frozen for release testing, which takes an additional 7-10 days. Patients are scheduled for ASCT once the cells are released back to the clinical site.

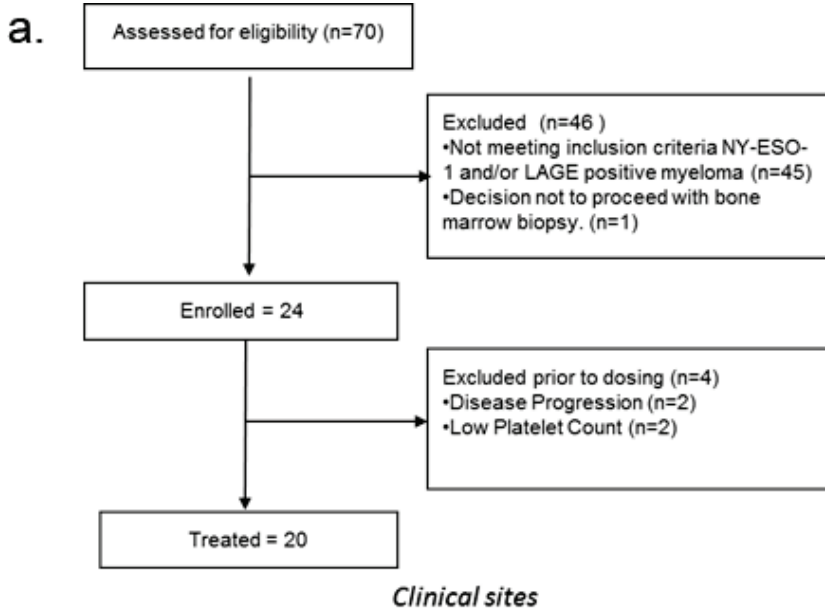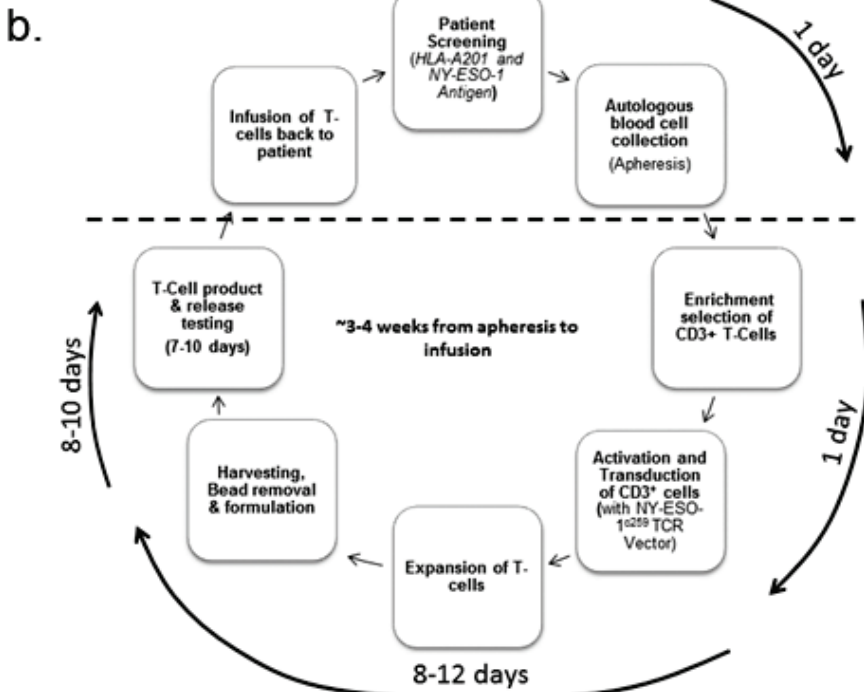

**Supplementary Figure 2. Gene marked cells in marrow at day 100.** A majority of patients underwent marrow collections at day 100 to assess response status, and the results of gene marking per microgram of DNA is represented in this panel. The percent of cells that the vector copies represent, assuming a single vector copy per cell, is shown by the dotted reference lines.

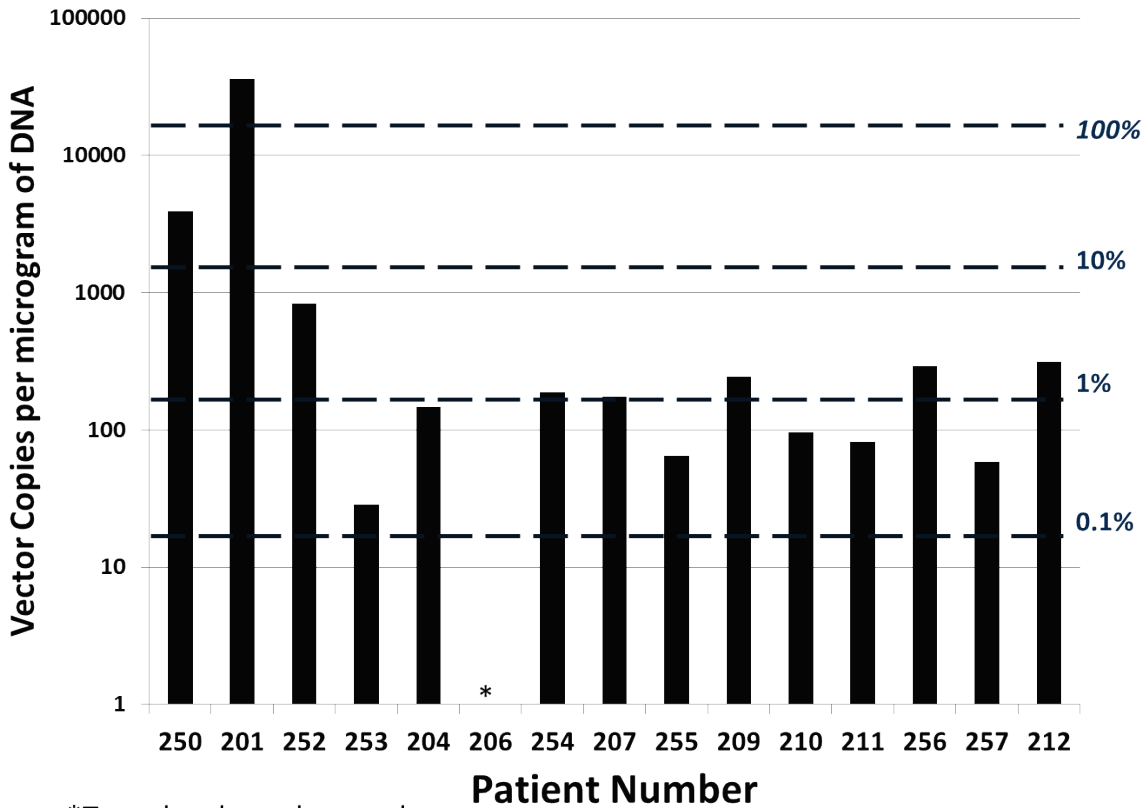

\*Tested and not detected

**Supplementary Figure 3. Long term expression of NY-ESO TCR in blood and marrow.**

Patients 250 and 201 were evaluated for persistence of gene modified cells by flow cytometry. The top two rows show persistence in blood, and the bottom two show persistence in marrow.

Mononuclear cells were isolated from blood and fresh marrow aspirates, and interrogated using CD3 antibody to detect T cells, and NY-ESO TCR specific dextramer reagent to detect gene modified cells. Gene marked cells are denoted by the box, and the number to the left of the box represents the overall percent positive cells from the CD3 positive fraction.

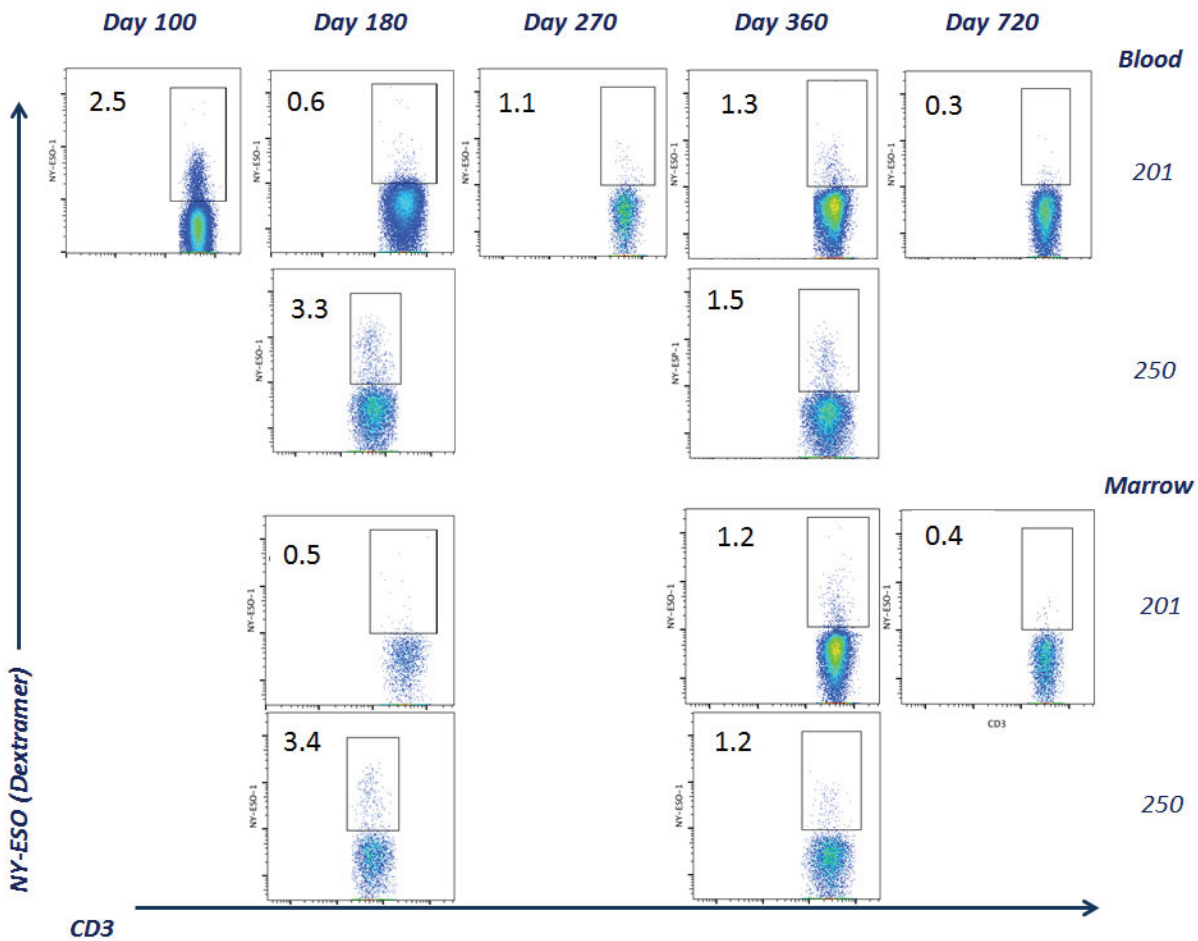

#### **Supplementary Figure 4. Sequencing of TCR v $\beta$ Chains from Patient #253 marrow.**

Histograms depicting the number of specific V $\beta$ –J $\beta$  gene segment combinations in the TCR $\beta$  chains are shown for the bone marrow of patient 253. **a.** marrow clonotype analysis from day 28 post second infusion. **b.** marrow clonotype analysis day 68 post second infusion.

Patient 253 had study treatment for aggressive relapse of kappa light chain secreting myeloma that occurred about 7 months after a first ASCT. Although she achieved a near-CR at day 100 post-ASCT #2 along with gene-modified T cells, her myeloma progressed by 6 months post-transplant. The study also allowed patients who had relapses of myeloma with NY-ESO-1/LAGE-1 antigen positive disease to receive a second infusion of gene-modified T-cells at up to a 5-fold higher dose after pre-conditioning with low-dose cyclophosphamide (1.5 g/m<sup>2</sup>) and 2 doses of bortezomib. Patient 253 had very strong antigen expression prior to the second infusion and also had a highly proliferative relapse of myeloma associated with hypercalcemia (12.7 mg/dl), an LDH level of 1076 (1.7 x ULN), transfusion-dependent pancytopenia, 10 grams/24 hours of Bence Jones kappa light chain excretion in the urine and a serum free kappa light chain level of 10,044 mg/L. Also, as shown in Fig 3c (“pre-T-cell panel”), the marrow was nearly 100% replaced by atypical CD138+ plasma cells many with plasmablastic features and all the metaphases showed 48-90 chromosomes with loss of 1p, 13q and deletion of 17p/p53 in 85% of the interphase cells by FISH analysis. Although the patient had previously progressed on lenalidomide maintenance and had no response to any bortezomib-containing regimens, she received the prescribed pre-conditioning using cyclophosphamide 1.5 g/m<sup>2</sup> and 2 doses of bortezomib followed by a infusion of 5 x 10<sup>10</sup> total CD3+ T-cells (her second) which were 28.8 % transduced. By day +14 after second T-cell transfer, the absolute lymphocyte count (ALC) rose from 200 cells/ $\mu$ l to 4425 cells/ $\mu$ l and the hypercalcemia improved. By day +24, the calcium level was down to 10.5 mg/dl but the LDH level peaked at 1579 (2.6 x ULN) and the serum free kappa light chain spiked to 23,194 mg/L while the marrow showed a significant increase in marrow-infiltrating CD8+ T-cells (see figure 3c). Low-dose lenalidomide was started on day +24 at a dose of 10 mg per day and 8 days later at day +32, the ALC rose further to 8366 cells/ $\mu$ l while the serum free kappa light chain level decreased to 9500 mg/L, the 24 hour urinary Bence Jones protein decreased to 1.3 g/24 hours and the calcium level became normal at 9.1 mg/dl. By day +38, a marrow examination showed a dramatic increase in the marrow-infiltrating CD8+ T-cells to 70% while the marrow plasmacytosis was decreased to ~ 15% with extensive CD138+ myeloma cell necrosis (see Fig 3c). Over the next month, the patient experienced a return to a good quality of life and the 24 hour urinary excretion of Bence Jones protein decreased to as low 280 mg/24 hours.

While immunoassays showed early detection of the gene-marked cells (see Figure 2), during the period of major clinical response, the CD8+ T-cell compartment was comprised of 2 dominant

Supplemental Data – NY-ESO<sup>c259</sup>-T for myeloma

clonotypes that were not gene-marked. About 2 weeks after the point of maximal clinical response, the relapse of myeloma occurred coincident with a fall in the level of circulating lymphocytes.

A

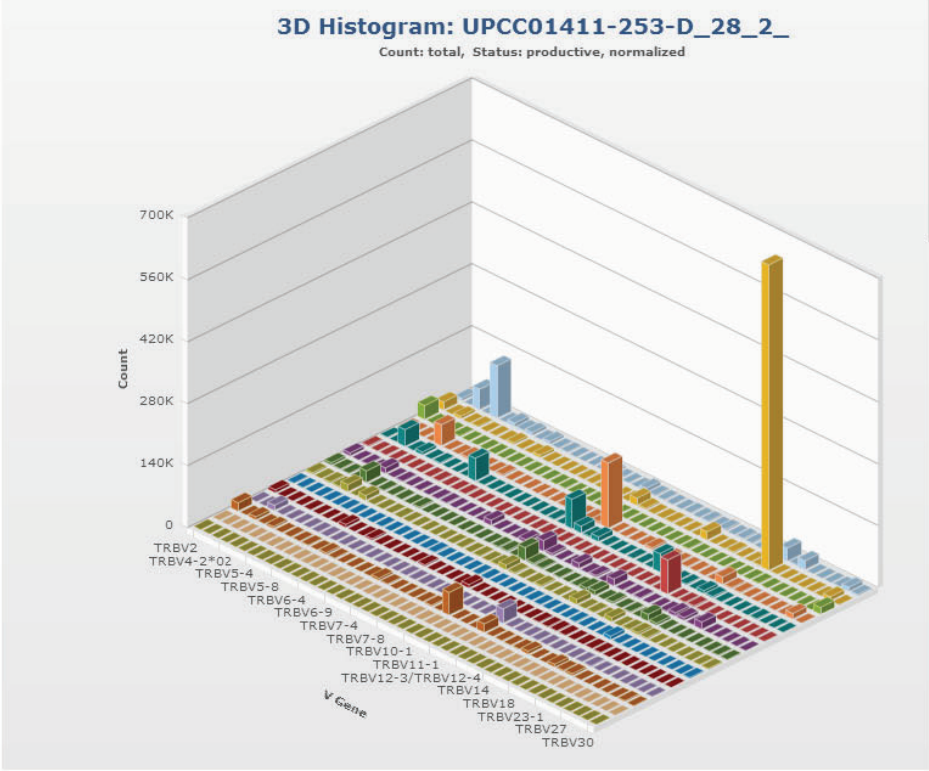

B

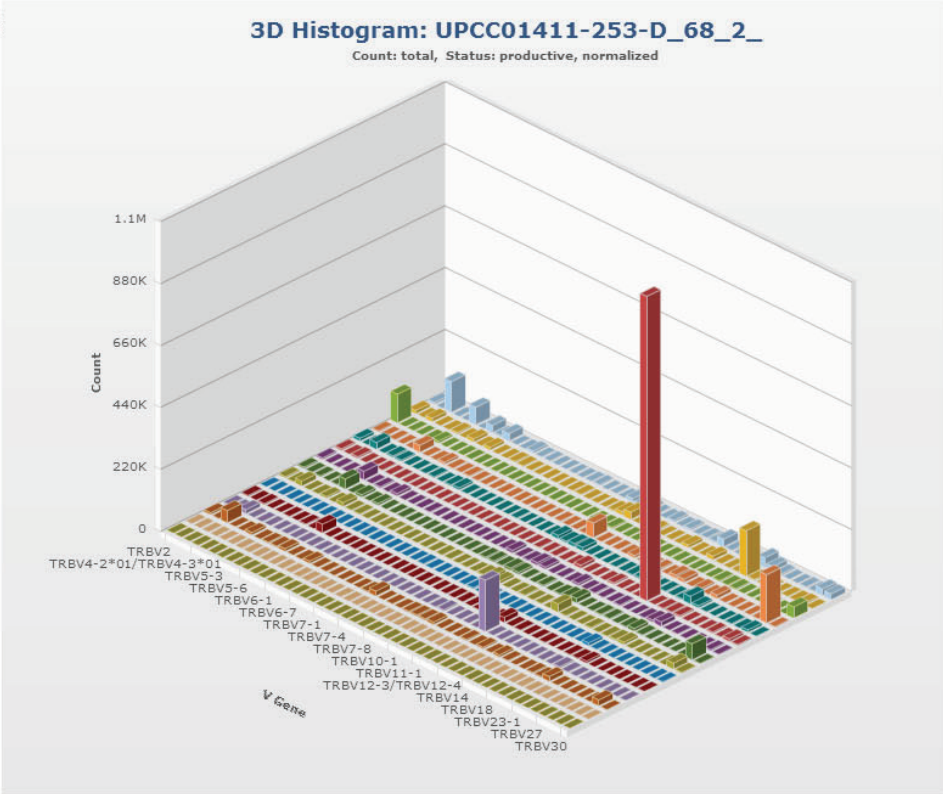



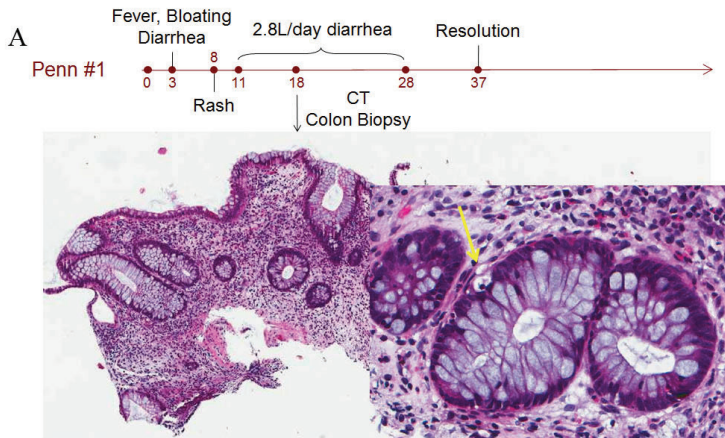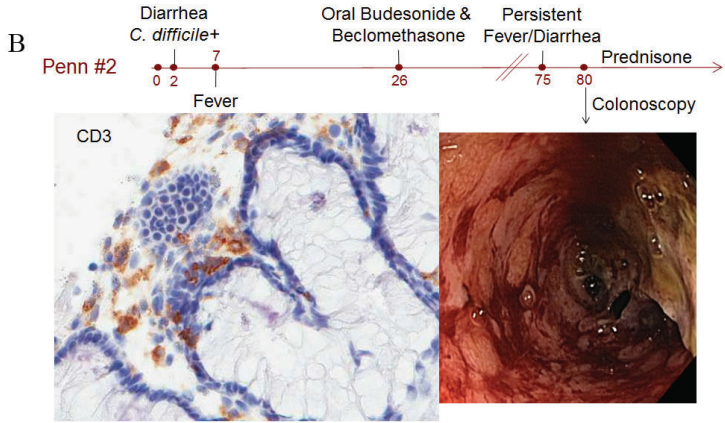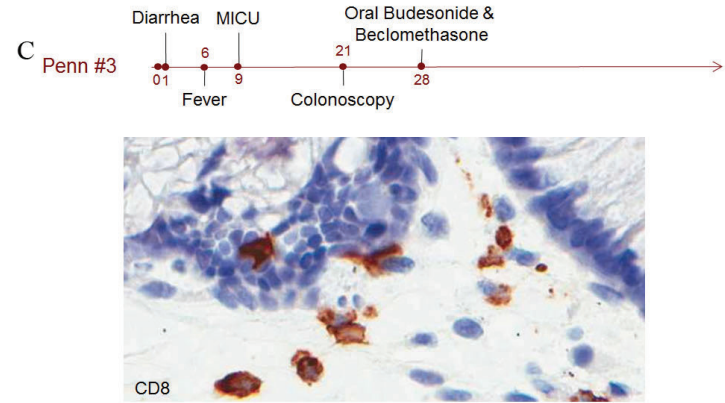

**Supplementary Figure 5. Clinical presentation of autologous graft versus host disease.**

Three patients experiencing diarrhea post-transplant and T cell infusion, and which had colonic biopsies performed are shown. The pathology for each patient was consistent with autologous graft versus host disease, with signs of immune infiltrates and tissue damage. A timeline of events for each patient is shown along the top of each panel. The events either spontaneously resolved or resolved after topical steroids.

**Supplementary Figure 6. Kinetics of paraprotein decline.** 11 of the 20 patients enrolled on the study had measurable baseline levels of paraprotein. Of these 11, paraprotein levels decreased to undetectable levels by the initial tumor assessment at 6 weeks post-transplant in six patients (not shown). Of these six, patients 259 and 204 showed improvement in disease response as measured by immunofixation between the first and second tumor assessment period (Supplementary Table 1). 5 patients experienced a gradual decrease in paraprotein levels over time, as shown in this Figure. Note that lenalidomide maintenance was not started until day 100 post-transplant, and therefore improvements between day 42 and 100 are independent of this immune modulator. Patients 260 and 252 experienced declines after day 100 but did not receive lenalidomide maintenance (Supplementary Table 1). Notably patients 207 and 211 who had light chain only tumor, also experienced a gradual improvement of their disease between the first and second tumor assessment period (reference Supplementary Table 1).

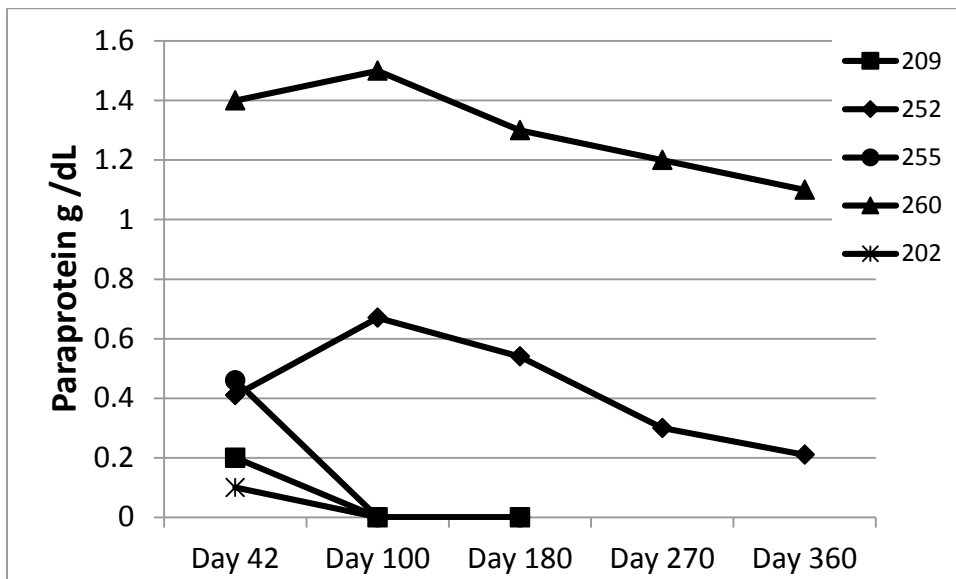

**Supplementary Figure 7. Overall Survival (OS) and Progression Free Survival, as estimated by the Kaplan-Meier method. Data as of April 1, 2015.**

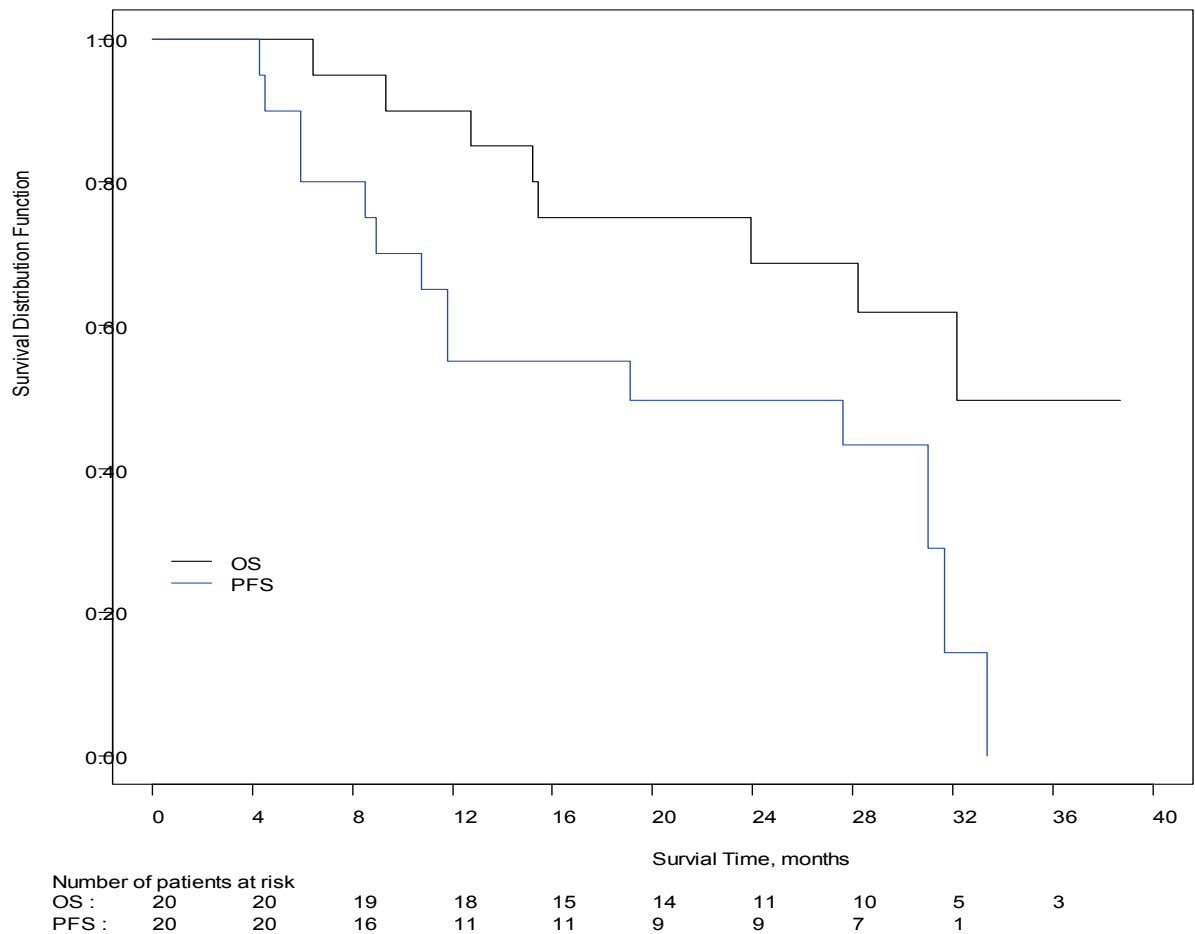

**Supplementary Note. Case study description of patients #252 and #260, in support of immune surveillance against antigen positive tumour.**

One patient is a 75 year old patient (252) who exhibited good persistence of gene-marked cells through day +360 along with a partial clinical response after 2<sup>nd</sup> ASCT and engineered T cell infusion per protocol. The monoclonal protein level fell from a pre-transplant value of 0.97 g/dl to a post-transplant value of 0.33 g/dl (day +180) corresponding to a decrease in marrow plasmacytosis from 10% to 4% (day +180). However, these residual myeloma cells were negative for NY-ESO-1 and LAGE-1 by PCR at days +42, +100, and +180 while gene-modified T-cells were detected in the blood and marrow at levels of 16-67 cells/mcl and 0.2-0.4% respectively during the same period of time. This patient remained in a stable PR at 2 years post-transplant while never having received lenalidomide maintenance due to post-transplant thrombocytopenia. A second patient (260) with active and treatment-refractory myeloma prior to transplant also had a minimal response to transplant and T-cell transfer (M-spike going from 1.7 g/dl to 1 g/dl) but this response was maintained for up to 9 months post-ASCT without any maintenance therapy and while follow up marrows at days 100 and 180 showed about 10% residual myeloma cells, tumor antigen expression was no longer detectable again suggesting selective elimination of the antigen-positive myeloma fraction which may have been responsible for the more aggressive clinical course that was observed before transplant. The patient has remained stable without myeloma progression at 1 year and 3 months post-ASCT.
